# Supplementary material
Source: PubMed Central journal article supplement (PMC8041229)

**Supplemental Figure 1.** High-risk HPV prevalence in two Higher HPV Prevalence settings (Mongolia; Nigeria), stratified by the general population (including lesions) versus women with normal cytology.

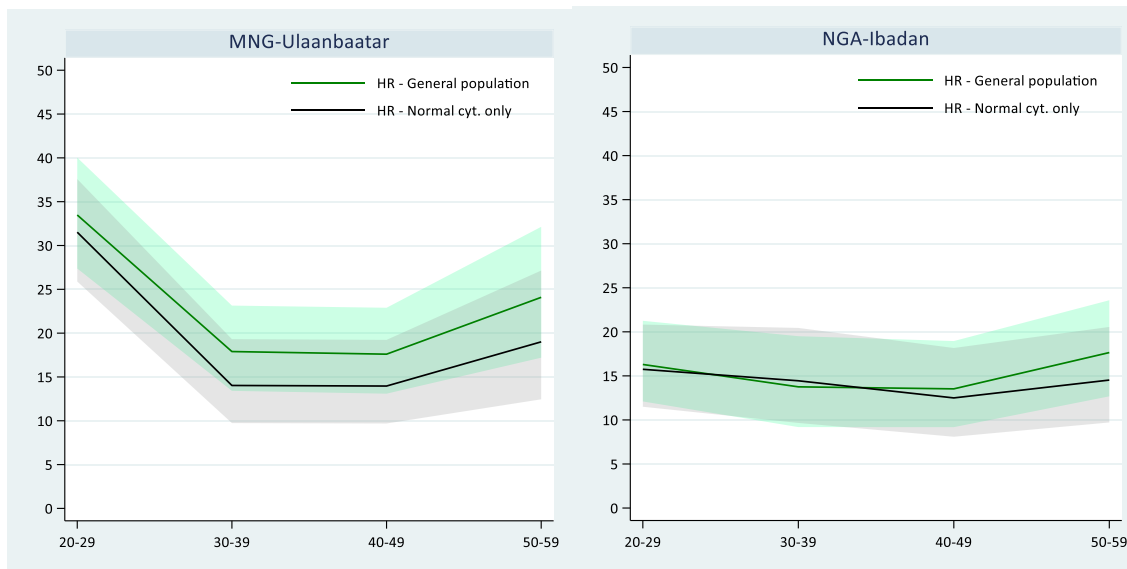

Supplement: NIHMS1676579-supplement-1.pdf [file NIHMS1676579-supplement-1.pdf]
